# Supplementary material
Source: HighWire-hosted journal article supplement (https://tobaccocontrol.bmj.com/content/30/e1/e45)
Supplement: inline-supplementary-material-1 [file inline-supplementary-material-1.pdf]

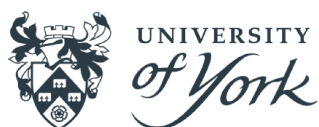

The Department of Health Sciences

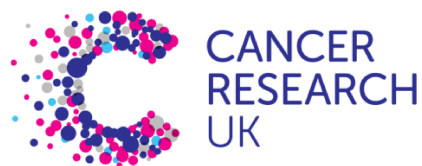

### Smokeless Tobacco Supply Chain Study – Survey Questionnaire

#### Section 1: Price and Taxation

|                                                                                                |       |       |       |       |       |
|------------------------------------------------------------------------------------------------|-------|-------|-------|-------|-------|
| 1. Smokeless tobacco product (s)                                                               | Name: | Name: | Name: | Name: | Name: |
| 1.1 How is the product sold?                                                                   |       |       |       |       |       |
| a) Loose, on its own                                                                           |       |       |       |       |       |
| b) Loose, mixed with other products (custom made)                                              |       |       |       |       |       |
| c) Packaged/ wrapped by retailer                                                               |       |       |       |       |       |
| d) Pre-packaged (by manufacturer)                                                              |       |       |       |       |       |
| If pre-packaged as d) above, is it:                                                            |       |       |       |       |       |
| i) packet                                                                                      |       |       |       |       |       |
| ii) tin                                                                                        |       |       |       |       |       |
| iii) bottle                                                                                    |       |       |       |       |       |
| iv) can                                                                                        |       |       |       |       |       |
| v) sachet                                                                                      |       |       |       |       |       |
| vi) box                                                                                        |       |       |       |       |       |
| vii) other – please state                                                                      |       |       |       |       |       |
| viii) with branding?                                                                           |       |       |       |       |       |
| 1.2 What is the minimum unit of sale?                                                          |       |       |       |       |       |
| a) By quantity? or                                                                             |       |       |       |       |       |
| b) By weight?                                                                                  |       |       |       |       |       |
| 1.3 What is the unit price that the customer pays?<br>(state whether by quantity or weight)    |       |       |       |       |       |
| 1.4 What is the unit price that the retailer pays?<br>(state whether by quantity or weight)    |       |       |       |       |       |
| 1.5 What is the amount of tax paid per unit?                                                   |       |       |       |       |       |
| a) By the supplier or manufacturer                                                             |       |       |       |       |       |
| b) By the seller (retailer)                                                                    |       |       |       |       |       |
| c) VAT?                                                                                        |       |       |       |       |       |
| d) Don't know                                                                                  |       |       |       |       |       |
| 1.6 What is the total number of units sold per month?<br>(state whether by quantity or weight) |       |       |       |       |       |

#### Section 2: Tobacco product display, contents and disclosures

List all smokeless tobacco products sold in the shop, and enter responses to the following questions against each product.

|                                                                     |    |    |    |    |    |
|---------------------------------------------------------------------|----|----|----|----|----|
| 2.1 Name of smokeless tobacco product:                              | 1. | 2. | 3. | 4. | 5. |
| 2.2 Is a licence required to sell it?                               |    |    |    |    |    |
| a) Yes                                                              |    |    |    |    |    |
| b) No                                                               |    |    |    |    |    |
| c) Don't know                                                       |    |    |    |    |    |
| 2.3 How do you decide where to place the product?                   |    |    |    |    |    |
| 2.4 Are there any promotions or discounts offered to the customers? |    |    |    |    |    |
| a) Yes                                                              |    |    |    |    |    |
| b) No                                                               |    |    |    |    |    |
| c) If yes, what are these?                                          |    |    |    |    |    |
| d) If yes, are these offered by you or the suppliers?               |    |    |    |    |    |

**Section 3: Packaging and labelling – see observations section at end.**

#### Section 4: Supplies

|                                                                                   |  |  |  |  |  |
|-----------------------------------------------------------------------------------|--|--|--|--|--|
| 4.1 Where do you get your supplies? (Tick all that apply)                         |  |  |  |  |  |
| a) Wholesalers (Cash and carry)                                                   |  |  |  |  |  |
| b) Manufacturers                                                                  |  |  |  |  |  |
| c) Importers                                                                      |  |  |  |  |  |
| d) Unknown source                                                                 |  |  |  |  |  |
| e) Others (Please state)                                                          |  |  |  |  |  |
| 4.2 Where are your suppliers based?                                               |  |  |  |  |  |
| a) UK                                                                             |  |  |  |  |  |
| b) Abroad                                                                         |  |  |  |  |  |
| c) If abroad, where?                                                              |  |  |  |  |  |
| d) Do you have their contact details? (Y/N)                                       |  |  |  |  |  |
| e) If yes, please provide.                                                        |  |  |  |  |  |
| 4.3 Why do you buy this product from a particular supplier? (Tick all that apply) |  |  |  |  |  |
| a) They are the only supplier                                                     |  |  |  |  |  |
| b) They can supply the required amount                                            |  |  |  |  |  |
| c) They are cheap                                                                 |  |  |  |  |  |
| d) They are nearby                                                                |  |  |  |  |  |
| e) They are a friend or family member                                             |  |  |  |  |  |
| f) They sell products or brands my customers want                                 |  |  |  |  |  |
| g) Another reason (please state)                                                  |  |  |  |  |  |
| 4.4 Are there any incentives to purchase it from a particular supplier?           |  |  |  |  |  |
| a) Yes                                                                            |  |  |  |  |  |

|                                                                       |  |  |  |  |  |
|-----------------------------------------------------------------------|--|--|--|--|--|
| b) No – go to section 4.5                                             |  |  |  |  |  |
| c) If yes, what is the nature of the incentive? (Tick all that apply) |  |  |  |  |  |
| (i) Discount                                                          |  |  |  |  |  |
| (ii) Promotional goods                                                |  |  |  |  |  |
| (iii) Point-of-sale displays                                          |  |  |  |  |  |
| (iv) Free sample                                                      |  |  |  |  |  |
| (v) Others (please state)                                             |  |  |  |  |  |
| 4.5 Where was the product manufactured?                               |  |  |  |  |  |
| a) UK – go to section 5                                               |  |  |  |  |  |
| b) Abroad                                                             |  |  |  |  |  |
| c) If abroad, please state where                                      |  |  |  |  |  |
| d) Don't know                                                         |  |  |  |  |  |

### Section 5: Education and Public Awareness

|                                                                                                           |     |    |
|-----------------------------------------------------------------------------------------------------------|-----|----|
| 5.1 Are you aware of any laws that impact on your business of selling smokeless tobacco products?         |     |    |
| a) Yes                                                                                                    |     |    |
| b) No                                                                                                     |     |    |
| c) If yes, please state which law(s) and how it affects your business                                     |     |    |
| 5.2 Are you visited by any inspector or regulator to inspect and/or test your smokeless tobacco products? |     |    |
| a) Inspect products                                                                                       | Yes | No |
| b) Test products                                                                                          | Yes | No |
| c) Check your licence or registration                                                                     | Yes | No |
| d) How many visits did you have in the last 3 years?                                                      |     |    |
| e) What happens after the inspection?                                                                     |     |    |
| (i) If found in compliance, you are given a certificate                                                   | Yes | No |
| (ii) If found in compliance, nothing happens                                                              | Yes | No |
| (iii) If found not in compliance, there is a penalty                                                      | Yes | No |
| (iv) If found not in compliance, nothing happens                                                          | Yes | No |
| (v) Any other consequences?                                                                               |     |    |
| 5.3 Do you have to disclose the contents of smokeless tobacco products to any statutory body?             |     |    |
| a) Yes                                                                                                    |     |    |
| b) No                                                                                                     |     |    |
| 5.4 Do you have to send the products to a laboratory, for testing?                                        |     |    |
| a) Yes                                                                                                    |     |    |
| b) No                                                                                                     |     |    |

### Section 6: Tobacco advertising, promotion and sponsorship

6.1 and 6.2 - See observations section at end

|                                                                                                |     |    |
|------------------------------------------------------------------------------------------------|-----|----|
| 6.3 How do you (retailer) try to retain your smokeless tobacco customers? Tick all that apply. |     |    |
| a) Offer discounts                                                                             | Yes | No |
| b) Offer promotional goods                                                                     | Yes | No |
| c) Offer credit lines                                                                          | Yes | No |
| d) Good customer relationships                                                                 | Yes | No |
| e) Other ways (please state)                                                                   |     |    |

### Section 7: Sale to/ by minors

|                                                                 |
|-----------------------------------------------------------------|
| 7.1 Do you have any sales assistants under the age of 18 years? |
|-----------------------------------------------------------------|

|                                                                                          |     |    |
|------------------------------------------------------------------------------------------|-----|----|
| a) Yes                                                                                   |     |    |
| b) No                                                                                    |     |    |
| c) If yes, what are their ages? Please list.                                             |     |    |
| d) Are they allowed to sell smokeless tobacco products?                                  | Yes | No |
| 7.2 Do you ever sell any smokeless tobacco products to young people under the age of 18? |     |    |
| a) Yes                                                                                   |     |    |
| b) No                                                                                    |     |    |
| c) If no, why not?                                                                       |     |    |

**Section 8: Support for viable alternatives**

|                                                                      |  |
|----------------------------------------------------------------------|--|
| 8.1 Why do you sell smokeless tobacco products? Tick all that apply. |  |
| a) Good profit margin                                                |  |
| b) Products are in demand                                            |  |
| c) Family business                                                   |  |
| d) No other viable alternative                                       |  |
| e) Brings people into my shop to buy other things                    |  |
| f) Other reasons (please state)                                      |  |
| 8.2 Would you ever consider stopping selling smokeless tobacco?      |  |
| a) Yes                                                               |  |
| b) No                                                                |  |
| c) If yes, for which of the following reasons? (Tick all that apply) |  |
| (i) A reduction in profit margin                                     |  |
| (ii) A reduction in demand                                           |  |
| (iii) Stricter regulations and inspections                           |  |
| (iv) Limited supply                                                  |  |
| (v) A viable alternative                                             |  |
| (vi) Awareness about its harms                                       |  |
| (vii) Other reasons (please state)                                   |  |

**Section 9: Observations (for Talib to complete from observing shop and SLT products):****From Section 3: Packaging and labelling**

For each smokeless tobacco product:

| Name of product                                                   | 1. | 2. | 3. | 4. | 5. |
|-------------------------------------------------------------------|----|----|----|----|----|
| 3.1 Does the product state the name/ address of the manufacturer? |    |    |    |    |    |
| a) Name only                                                      |    |    |    |    |    |
| b) Address only                                                   |    |    |    |    |    |
| c) Name and address                                               |    |    |    |    |    |
| d) Neither name nor address                                       |    |    |    |    |    |
| e) Illegible name/ address                                        |    |    |    |    |    |
| 3.2 What is the country of origin of the product?                 |    |    |    |    |    |
| 3.3 Are the contents of the product listed on the packaging?      |    |    |    |    |    |
| a) Yes                                                            |    |    |    |    |    |
| b) No                                                             |    |    |    |    |    |
| c) Illegible contents list                                        |    |    |    |    |    |
| 3.4 Is weight per content given?                                  |    |    |    |    |    |
| a) Yes                                                            |    |    |    |    |    |
| b) No                                                             |    |    |    |    |    |

|                                                                                       |  |  |  |  |  |
|---------------------------------------------------------------------------------------|--|--|--|--|--|
| 3.5 Are there any statements on the packaging and labelling making any health claims? |  |  |  |  |  |
| a) Yes                                                                                |  |  |  |  |  |
| b) No                                                                                 |  |  |  |  |  |
| c) If yes, what claims?                                                               |  |  |  |  |  |
| 3.6 Are there any statements on the packaging and labelling trivialising harms?       |  |  |  |  |  |
| a) Yes                                                                                |  |  |  |  |  |
| b) No                                                                                 |  |  |  |  |  |
| c) If yes, what are these?                                                            |  |  |  |  |  |
| 3.7 Is there a health warning on the package?                                         |  |  |  |  |  |
| a) Yes                                                                                |  |  |  |  |  |
| b) No – Go to Section 4                                                               |  |  |  |  |  |
| c) If yes, is it: (i) written?                                                        |  |  |  |  |  |
| (ii) pictorial?                                                                       |  |  |  |  |  |
| (iii) both?                                                                           |  |  |  |  |  |
| d) If written, what proportion of the package does it cover?                          |  |  |  |  |  |
| e) If written, is it legible? (Y/N)                                                   |  |  |  |  |  |
| f) What does it say?                                                                  |  |  |  |  |  |
| g) What language is it written in?                                                    |  |  |  |  |  |
| h) If pictorial, what proportion of the package does it cover?                        |  |  |  |  |  |
| i) What does the picture depict?                                                      |  |  |  |  |  |

**From Section 6: Tobacco advertising, promotion and sponsorship:**

|                                                                                                                                                       |                    |    |
|-------------------------------------------------------------------------------------------------------------------------------------------------------|--------------------|----|
| 6.1 Are there any point-of-sale displays of the following types for any tobacco product <b>OUTSIDE</b> the shop? (State what type of tobacco product) |                    |    |
| a) Boards                                                                                                                                             | Yes                | No |
| b) Banners                                                                                                                                            | Yes                | No |
| c) Posters                                                                                                                                            | Yes                | No |
| d) Stands                                                                                                                                             | Yes                | No |
| e) Any other types of advertising?                                                                                                                    | Yes – please state | No |
| 6.2 Are there any point-of-sale displays of the following types for any tobacco product <b>INSIDE</b> the shop? State what type of tobacco product)   |                    |    |
| a) Shelf edging                                                                                                                                       | Yes                | No |
| b) Dummy packs                                                                                                                                        | Yes                | No |
| c) Display packs                                                                                                                                      | Yes                | No |
| d) Display stands                                                                                                                                     | Yes                | No |
| e) Any other types of advertising?                                                                                                                    | Yes – please state | No |

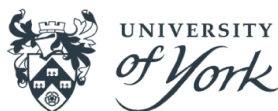

The Department of Health Sciences

## Smokeless Tobacco Supply Chain Study

Interviews with ST retailers - Topic Guide

Time needed – 45-60 minutes

### **General questions/Ice breakers**

- Since when have you been selling tobacco products (cigarettes included) in your shop?
- When and why did you start selling smokeless tobacco?
- What is the amount of sales you make on a regular day? How much of it comes from tobacco (and Smokeless tobacco)

### **Article 6: Price and taxation**

- What are your views on the current price of smokeless tobacco?
- Has there been any rise in taxes and/or price of smokeless tobacco in the last 2-3 years? If so, what effect has it had on your business?
- If there were a 50% rise in taxes and price of smokeless tobacco, would it affect your business? If yes, how? If not, why not?
- How would you respond to such an increase in tax or overall price of smokeless tobacco products?

### **Article 11: Packaging and labelling of ST products**

- How important is it to you for all smokeless tobacco products to display a health warning (graphic or otherwise)?
- Do health warnings on tobacco products influence your business? How?
- What would happen/be the problem if it becomes mandatory for all smokeless tobacco products to carry a health warning?
- Would a graphic health warning on all smokeless tobacco products deter your customers? Why?

### **Article 13: Advertising, promotion and sponsorship**

- In your view, should smokeless tobacco products be on display to customers? And why?
- Does it make a difference to your business if your smokeless tobacco products are on display or not? How?
- In your view, should the contents of smokeless tobacco products be tested and labelled to help customers make the right choice? If yes, how should this be done?
- If government introduces regular testing of all smokeless tobacco products, would it work? Why?
- Have you ever done promotional display(s) of any smokeless tobacco product inside or outside your shop?
- Have there ever been any problems with any such promotional displays? /Do you think there would be a problem if you did?
- How do shopkeepers usually promote smokeless tobacco products? How do you do it?

### **Article 15: Illicit trade in tobacco products**

- Are there any fake smokeless tobacco products in the market? Are they widely sold in the UK? How?
- Are there any smokeless tobacco products that are banned in the UK? Are they widely sold in the UK? How?
- Would selling such products (fake and banned) be a problem?
- Do such products arrive through normal import channels or are there any other ways too?
- Are you aware of any products that are produced informally or locally in households and then sold in shops?

**Article 16: Sale to and by minors**

- Do children/teenagers ask for smokeless tobacco products? To what extent?
- Is selling smokeless tobacco products to children a problem? Why?
- If there are any age restrictions imposed by the government, how would it affect your business?
- If there were age restrictions on selling smokeless tobacco products to children, would they still be able to get smokeless tobacco products? How?

**Article 17: Support for viable alternatives/suggestions**

- Have you considered/would you like to consider any other business that does not involve selling smokeless tobacco? If yes, why? If not, why not?
- Under what circumstances would you consider stopping selling smokeless tobacco?
- What do you think should be done to discourage use of SLT products by your customers?
- If there needs to be any action taken to reduce SLT use in the UK population, who should be the one to take it and how?

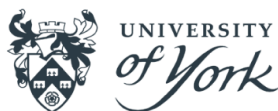

The Department of Health Sciences

## Smokeless Tobacco Supply Chain Study

Interviews with ST suppliers - Topic Guide

Time needed – 45-60 minutes

### General questions/Ice breakers:

- Can you tell me about the type of work that you do?
  - How long have you been working in this role?
  - Where were you working before that?
  - How did you start working with tobacco products?
- What type of tobacco products do you deal in?
- Can you tell me about the smokeless tobacco products you have?
  - How many types of smokeless tobacco do you have?
  - Where do these products sell most? How does it usually get there?
  - Which of these products are most commonly consumed?
- Do you sell smokeless tobacco products outside the UK as well?
  - Where?
  - How do these products get there?

### Article 6: Price and taxation

- Can you tell me more about the smokeless tobacco products you supply?
  - Where are these products originally made?
  - How do they get here?
  - Where do you usually get them from? (If self-imported, ask about duty applies to these products)

#### **(ask the following questions if the respondent also prepares/manufacturers ST)**

- Can you tell me about the ingredients used in smokeless tobacco products?
  - How are they used in the manufacture?
  - Where do you get these ingredients? Who do you get them from?
  - How much do they cost?
  - Have the prices changed over time? Does that affect your business in any way?
  - Does the cost also include any taxes?

### Article 9: Regulation of contents of tobacco products

- Do the contents have to be disclosed to anyone?
  - Who?
  - How is this done?
- Are you aware of any rules regarding such requirements?
  - What do these include?



- Are these requirements mandatory?
- What happens if products don't meet these requirements?

#### **Article 11: Packaging and labelling of ST products**

- Are there any requirements around the packaging of smokeless tobacco products? (ask for health warnings, marking, language etc.)
  - Who places these requirements?
  - What type of requirements are these?
  - How do you address them?
  - What products do these apply to (local/exported?)

#### **Article 13: Advertising, promotion and sponsorship**

- How do you normally promote your smokeless tobacco products?
  - Do you offer any discounts, promotions or sponsorships?
  - If yes, what type of discounts/promotions/sponsorships are offered? and to whom?
  - Does this impact your business? If yes, how? If no, why not?

#### **Article 15: Illicit trade in tobacco products**

- Do you have to register smokeless tobacco products to sell them in the UK?
  - If yes, who are these registered with?
  - What requirements do you have to go through?
- Are there any fake or counterfeit products on the market?
  - Where do they come from?
  - How are they identified?

#### **Article 16: Sale to and by minors:**

- Do you know if children buy or consume any of these smokeless tobacco products?
  - What are your views on this?
  - Are there any prevention measures in place for these smokeless tobacco products? what are these? Do you think these are useful/effective?

#### **Article 17: Support for viable alternatives:**

- Have you ever considered moving completely to products besides smokeless tobacco?
  - If yes, what products would they be?
  - If no, why not?
- What do you think will encourage you to give up manufacture/distribution of Smokeless tobacco products?
- What are your views on ST use?
  - Is it a problem in the UK? Why is it a problem?
  - What do you think needs to be done?
  - Do you think this would affect your business? How?
- Is there anything else you would like to tell me?
