# Supplementary material
Source: HighWire-hosted journal article supplement (https://tobaccocontrol.bmj.com/content/30/e1/e45)
Supplement: inline-supplementary-material-2 [file inline-supplementary-material-2.pdf]

**Supplementary Table 1: Distribution of shops approached, identified as ST retail outlets and surveyed across five UK boroughs**

|                       | Number of shops approached | Shops identified as ST retail outlets | Completed surveys |
|-----------------------|----------------------------|---------------------------------------|-------------------|
| <b>Birmingham</b>     | <b>80</b>                  | <b>55</b>                             | <b>28</b>         |
| <i>Lozells</i>        | 24                         | 15                                    | 7                 |
| <i>Aston</i>          | 10                         | 8                                     | 3                 |
| <i>Washwood Heath</i> | 21                         | 16                                    | 11                |
| <i>Nechelles</i>      | 0                          | 0                                     | 0                 |
| <i>South Yardley</i>  | 25                         | 16                                    | 7                 |
| <b>Blackburn</b>      | <b>55</b>                  | <b>23</b>                             | <b>15</b>         |
| <i>Bastwell</i>       | 6                          | 3                                     | 3                 |
| <i>Wensley Fold</i>   | 7                          | 3                                     | 2                 |
| <i>Audley</i>         | 17                         | 6                                     | 5                 |
| <i>Little Harwood</i> | 13                         | 5                                     | 3                 |
| <i>Shear brow</i>     | 12                         | 6                                     | 2                 |
| <b>Bradford</b>       | <b>81</b>                  | <b>53</b>                             | <b>25</b>         |
| <i>Bradford Moor</i>  | 18                         | 13                                    | 7                 |
| <i>Little Horton</i>  | 12                         | 8                                     | 3                 |
| <i>Toller Lane</i>    | 17                         | 9                                     | 4                 |
| <i>Heaton</i>         | 17                         | 12                                    | 8                 |
| <i>Keighley</i>       | 12                         | 8                                     | 3                 |
| <i>Great Horton</i>   | 5                          | 3                                     | 0                 |
| <b>Leicester</b>      | <b>68</b>                  | <b>26</b>                             | <b>8</b>          |
| <i>Humberstone</i>    | 6                          | 3                                     | 2                 |
| <i>Stoneygate</i>     | 16                         | 5                                     | 6                 |
| <i>Rushey Mead</i>    | 20                         | 7                                     | 0                 |
| <i>Spinney Hill</i>   | 8                          | 4                                     | 0                 |
| <i>Evington</i>       | 18                         | 7                                     | 0                 |

|                      |    |    |    |
|----------------------|----|----|----|
| <b>Tower Hamlets</b> | 84 | 35 | 23 |
| Bethnal Green        | 22 | 5  | 3  |
| Stephney Green       | 8  | 4  | 3  |
| Whitechapel          | 26 | 11 | 6  |
| Spitalfields         | 14 | 5  | 5  |
| Shadwell             | 14 | 10 | 6  |

**Supplementary table 2. Compliance with UK tobacco control regulations applicable to ST products by ST product category**

|           |                                                                                     | Naswar    | Dry snuff | Zarda    | Gutka     | Chewing tobacco | Overall    |
|-----------|-------------------------------------------------------------------------------------|-----------|-----------|----------|-----------|-----------------|------------|
|           | <i>Total number of tobacco products identified</i>                                  | 12        | 12        | 8        | 3         | 6               | 41         |
| <b>1.</b> | <b>Notification of Tobacco products</b>                                             |           |           |          |           |                 |            |
|           | <i>1.1- Product(s) listed in the notified products list</i>                         | 0 (0%)    | 0 (0%)    | 0 (0%)   | 0 (0%)    | 0 (0%)          | 0 (0%)     |
| <b>2.</b> | <b>Contents &amp; limits</b> n/a                                                    |           |           |          |           |                 |            |
| <b>3.</b> | <b>Product packaging features</b>                                                   |           |           |          |           |                 |            |
|           | <i>3.1- No information about tar, nicotine or CO</i>                                | 12 (100%) | 12 (100%) | 8 (100%) | 3 (100%)  | 6 (100%)        | 41 (100%)  |
|           | <i>3.2- No indication of discounts, price reductions or offers</i>                  | 12 (100%) | 12 (100%) | 8 (100%) | 3 (100%)  | 6 (100%)        | 41 (100%)  |
|           | <i>3.3- Does not indicate product is less harmful than others</i>                   | 12 (100%) | 12 (100%) | 8 (100%) | 3 (100%)  | 6 (100%)        | 41 (100%)  |
|           | <i>3.4- No indication of vitalising, energising, healing, rejuvenating, natural</i> | 12 (100%) | 12 (100%) | 8 (100%) | 2 (66.6%) | 5 (83.3%)       | 39 (95.1%) |

|           |                                                            |            |           |           |           |            |            |
|-----------|------------------------------------------------------------|------------|-----------|-----------|-----------|------------|------------|
|           | <i>or organic properties</i>                               |            |           |           |           |            |            |
|           | <i>3.5- No indication of environmental benefit</i>         | 12 (100%)  | 12 (100%) | 8 (100%)  | 3 (100%)  | 6 (100%)   | 41 (100%)  |
|           | <i>3.6- No indication of taste, smell or flavours</i>      | 10 (83.3%) | 12 (100%) | 3 (37.5%) | 2 (66.6%) | 3 (50.0%)  | 11 (73.1%) |
|           | <i>3.7- Does not resemble food product*</i>                | 1 (91.6%)  | 12 (100%) | 6 (75.0%) | 0 (0%)    | 2 (33.3%)  | 31 (75.6%) |
| <b>4.</b> | <b>Compliance with health warning (HW) requirement</b>     |            |           |           |           |            |            |
|           | <i>Total number of products containing health warnings</i> | 5 (41.6%)  | 9 (75.0%) | 6 (75.0%) | 3(100%)   | 6(100%)    | 29 (70.7%) |
|           | 4.1- in English**                                          | 4 (80.0%)  | 8 (88.8%) | 2(33.3%)  | 3(100%)   | 6(100.0%)  | 23 (79.3%) |
|           | 4.2- fully visible**                                       | 5 (100.0%) | 9 (100%)  | 5 (83.3%) | 3(100%)   | 5 (83.3%)  | 27 (93.1%) |
|           | 4.3- permanent**                                           | 5 (100.0%) | 9 (100%)  | 6 (100%)  | 3(100%)   | 6 (100.0%) | 29(100%)   |
|           | 4.4 Non-removable**                                        | 5 (100.0%) | 9 (100%)  | 6 (100%)  | 3(100%)   | 6 (100.0%) | 29 (100%)  |
|           | 4.5 Printed on pack**                                      | 2 (40.0%)  | 5(55.5%)  | 1 (16.7%) | 3(100%)   | 6 (100.0%) | 20 (68.9%) |
|           | 4.6 Surrounded by black border**                           | 1 (20.0%)  | 4 (44.4%) | 1 (16.7%) | 3(100%)   | 3(50.0%)   | 12 (41.3%) |

|  |                                                                   |            |           |           |           |            |            |
|--|-------------------------------------------------------------------|------------|-----------|-----------|-----------|------------|------------|
|  | 4.7 Appearing on 2 surfaces**                                     | 1 (20.0%)  | 5 (55.5%) | 1 (16.7%) | 2 (66.6%) | 1 (16.6%)  | 10 (34.4%) |
|  | 4.8 covers $\geq 30\%$ area on each side**                        | 1 (20.0%)  | 4 (44.4%) | 6 (100%)  | 1 (33.3%) | 1 (16.6%)  | 7 (24.1%)  |
|  | 4.9 Uses correct font (black, helvetica) and background (white)** | 1 (20.0%)  | 5 (55.5%) | 1 (16.7%) | 2 (66.6%) | 3 (50.0%)  | 12 (41.3%) |
|  | 4.10 HW appears in center of the area reserved**                  | 1 (20.0%)  | 8 (88.8%) | 4 (66.6%) | 3(100%)   | 5 (83.3%)  | 21 (72.4%) |
|  | 4.11 HW is parallel to main text **                               | 5 (100.0%) | 8 (88.8%) | 5(83.3%)  | 3(100%)   | 6 (100.0%) | 27 (93.1%) |

\* defined as ST products with brightly coloured packaging resembling confectionery products

\*\* Information presented for products containing a health warning

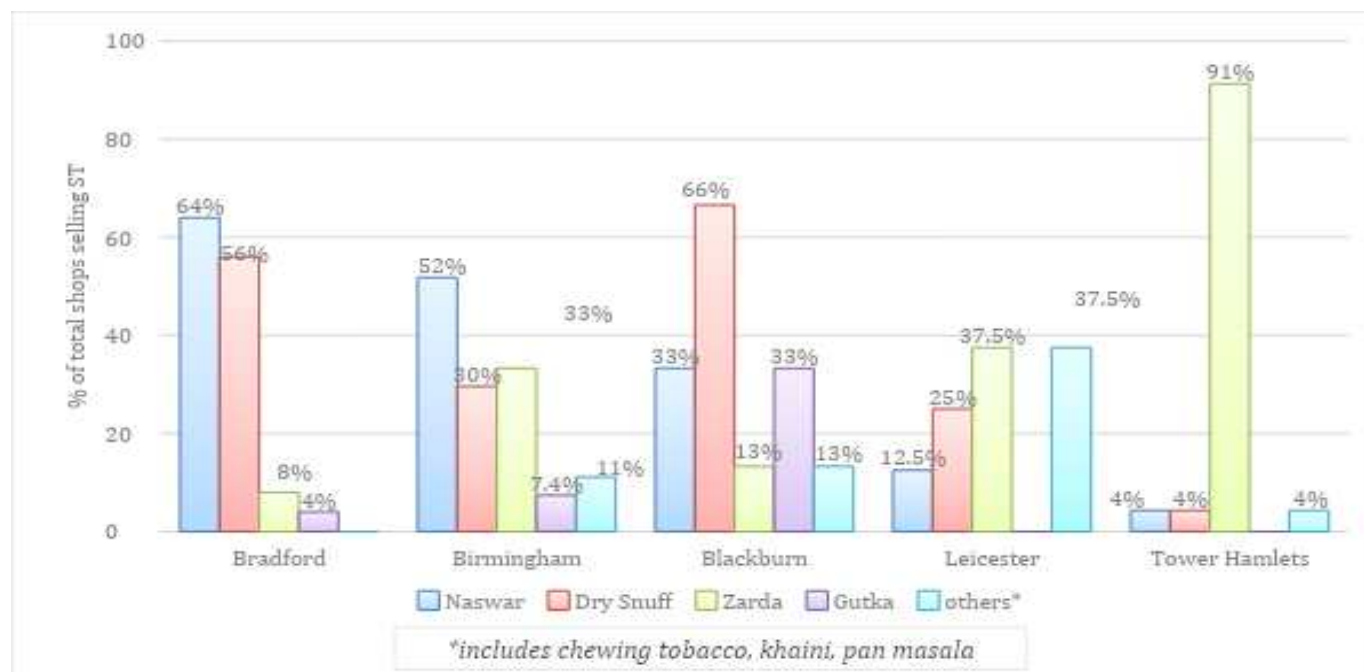

**Supplementary Figure 1: Percentage of ethnic shops selling ST products in each surveyed borough**
